# Supplementary material for: A pan-cancer landscape of LILRB4 identifies it as a context-dependent marker of the myeloid and antigen-presentation axis
Source: Research Square preprint supplement (doi:10.21203/rs.3.rs-7595770/v1), 2025-10-17
Supplement: Supplementary file 1 [file 6b3144d51e0128d5426cbd07.docx]

Supplementary materials


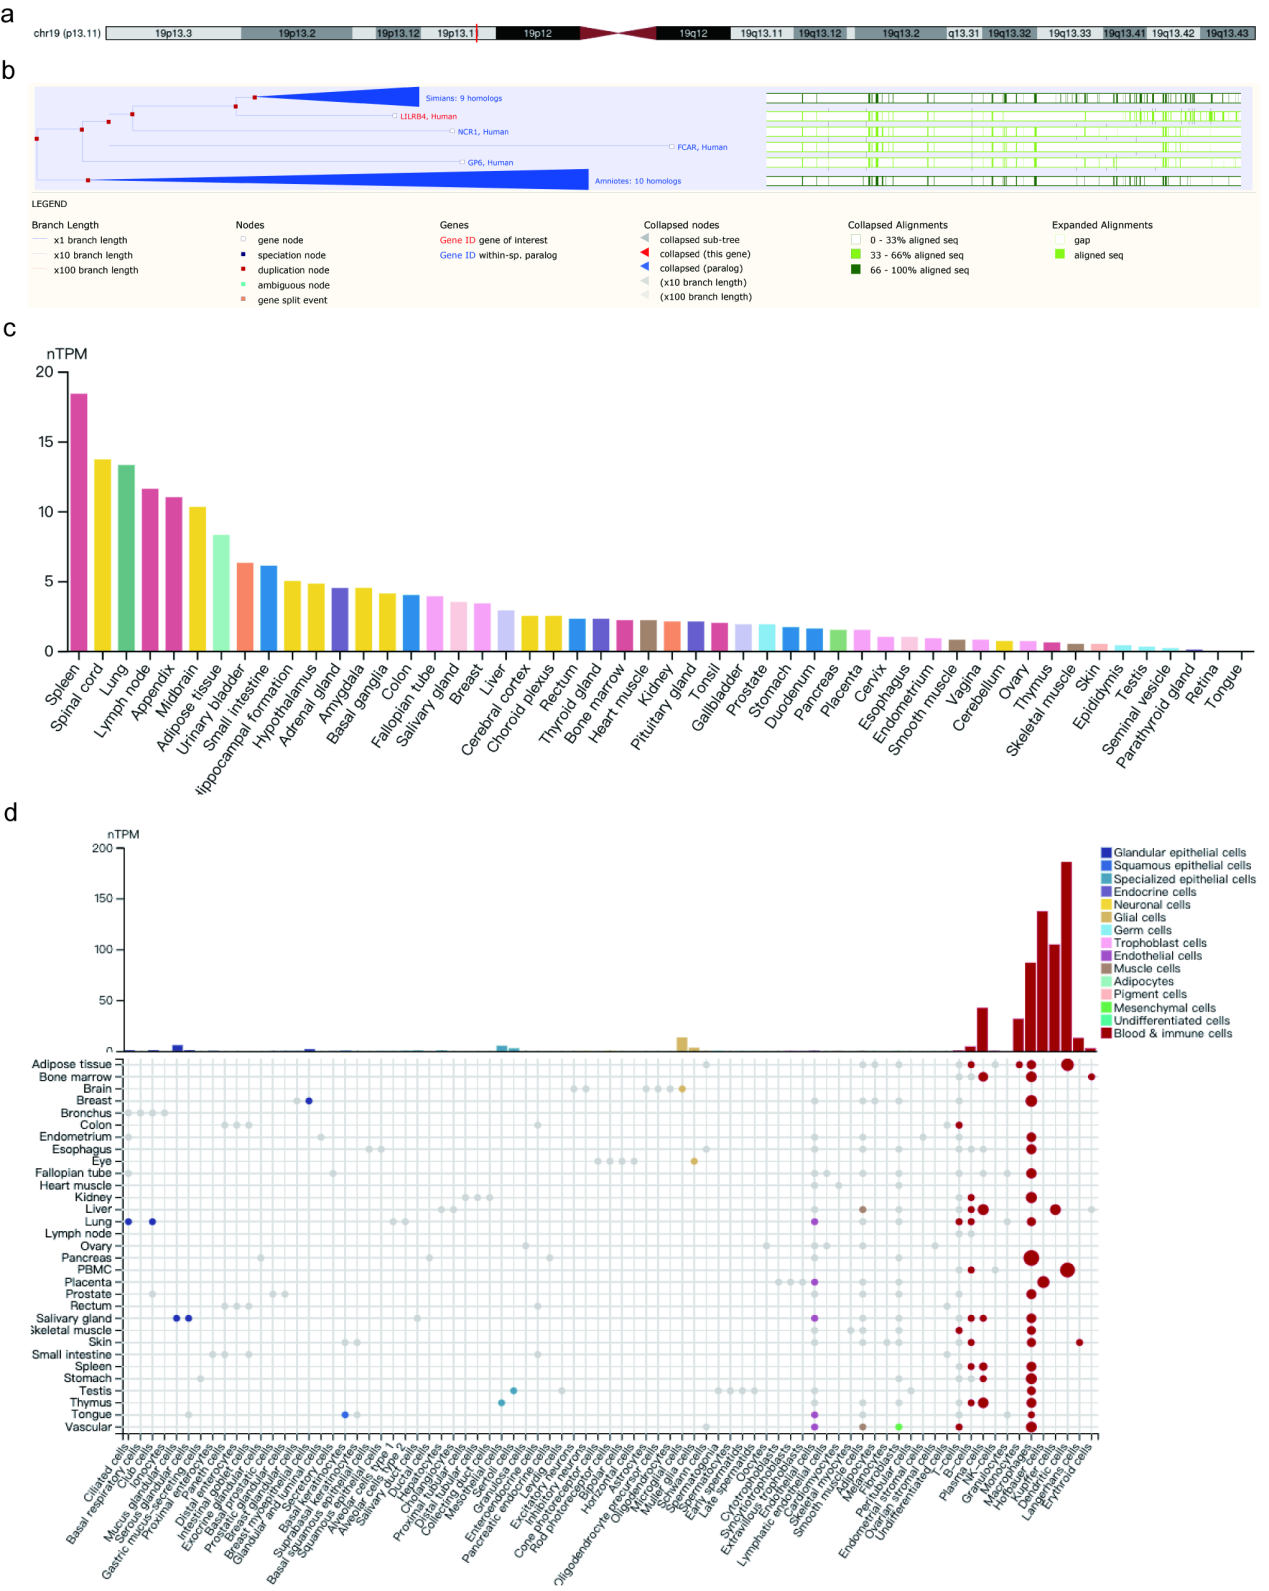


**Fig. S1 | Genomic location, phylogeny and normal tissue expression of LILRB4.** a) Chromosomal location of LILRB4 at 19p13.1. b) Phylogenetic tree generated from Ensembl showing the evolutionary relationship of LILRB4 with other immune receptors. c) Tissue-level expression distribution from the Human Protein Atlas (Consensus dataset). d) Single-cell expression profiles of LILRB4 in immune cell types from the Human Protein Atlas.


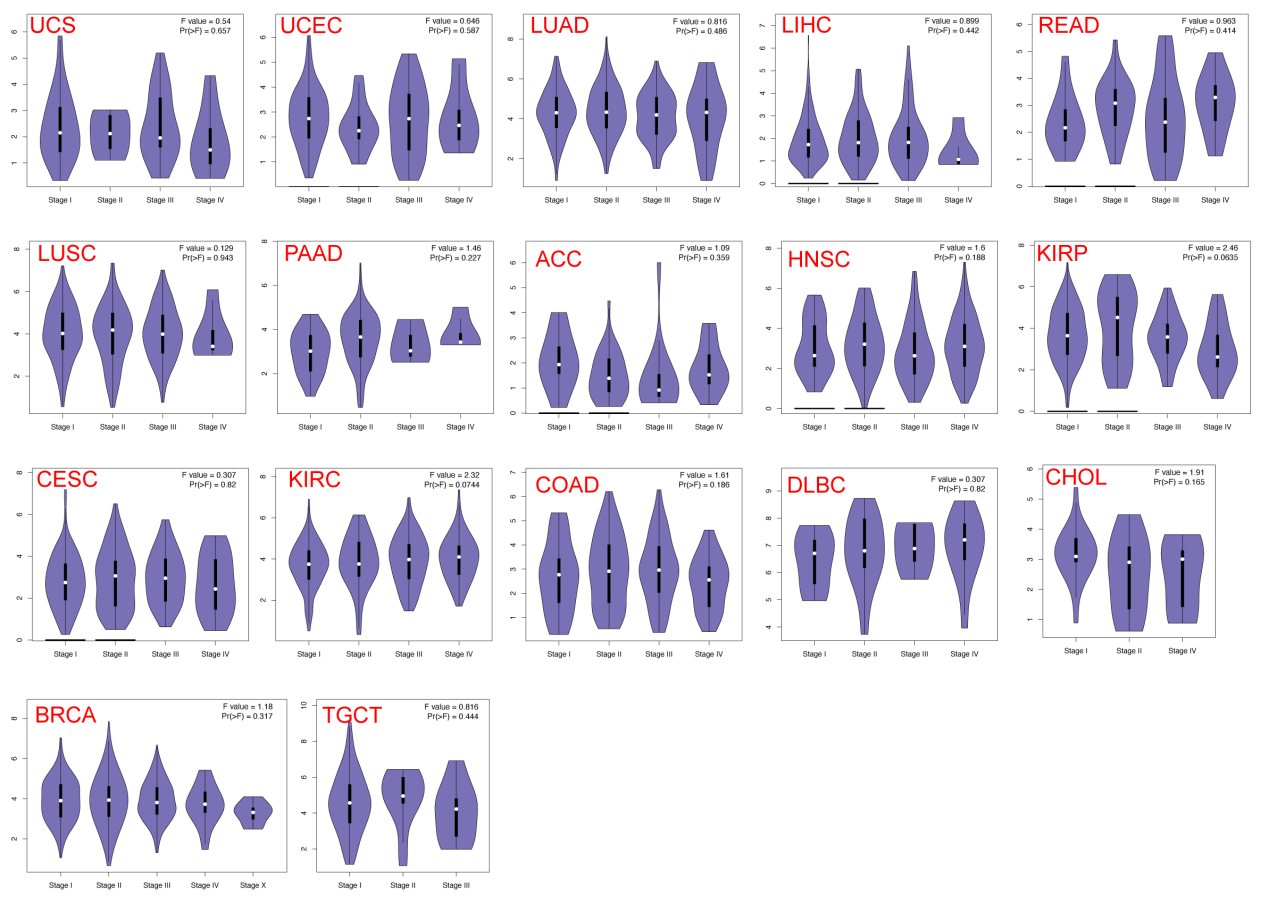


**Fig. S2 | Expression differences of LILRB4 across pathological stages of cancer types.** Comparison of LILRB4 expression levels across pathological stages in multiple TCGA cohorts, analyzed using the GEPIA2 platform.
